# Supplementary material for: FoodOmicsGR_RI: A Consortium for Comprehensive Molecular Characterisation of Food Products
Source: MDPI journal article supplement (doi:10.3390/metabo11020074), 2021-01-27
Supplement: s1 [file s1]

## Supplementary Materials

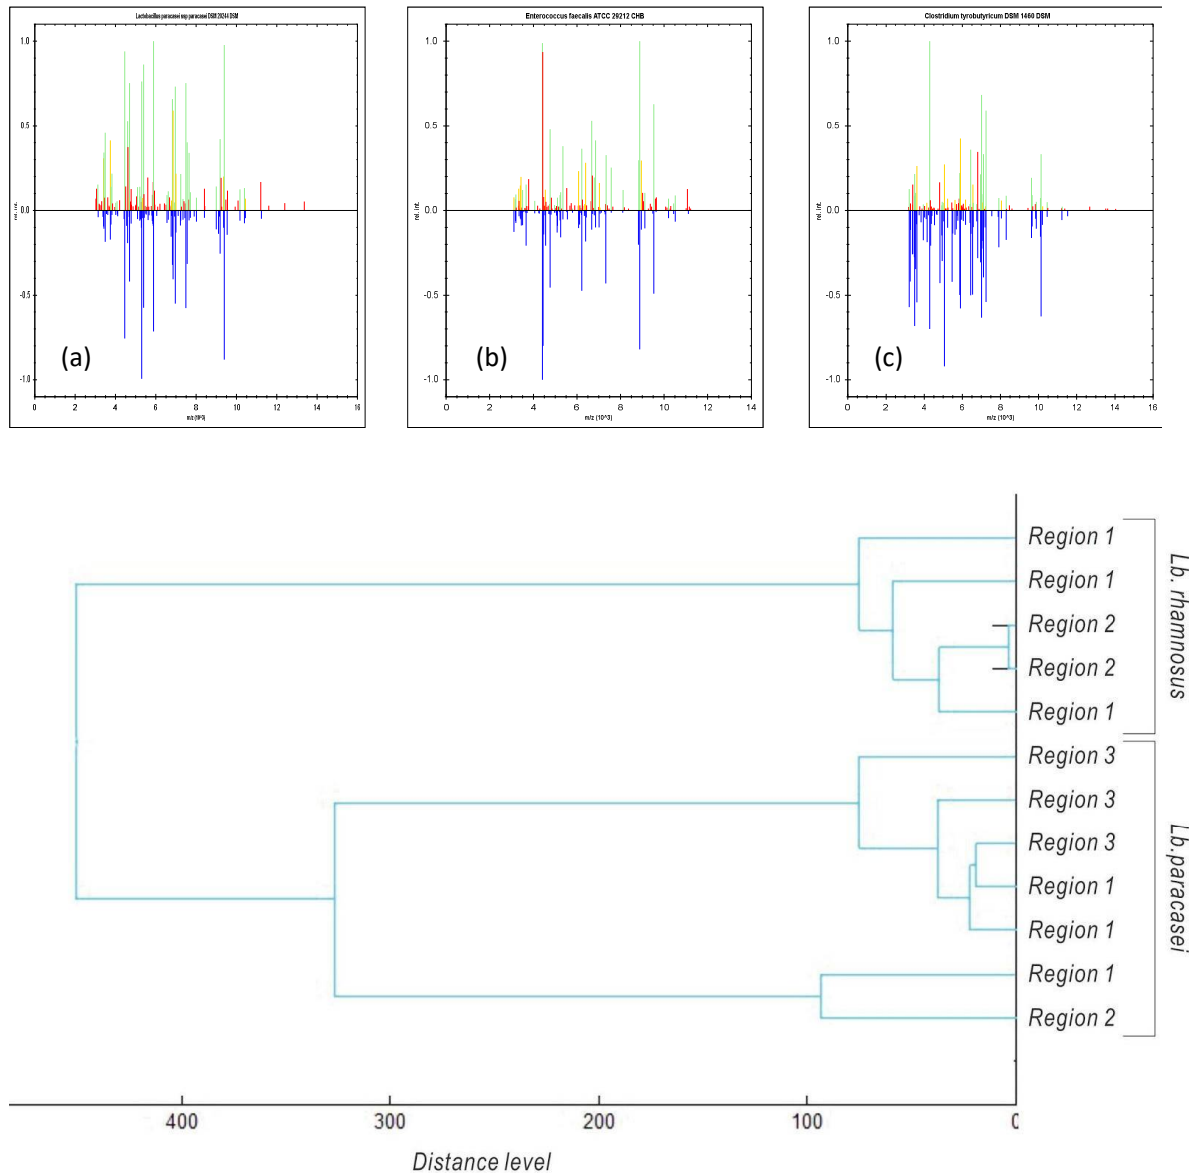

**Figure S1.** A characteristic Example of cheese classification based on MALDI-TOF-MS analysis. (a): Spectrum pattern: *Lactobacillus paracasei* (beneficial microorganism) (b): Spectrum pattern: *Enterococcus faecalis* (potentially pathogenic microorganism) (c): Spectrum pattern: *Clostridium tyrobutyricum* (spoilage microorganism). Every strain was compared to library's reference spectrum pattern (blue peaks) and the similarity of the examined strain was visualised by the green peaks. (d): Phyloproteomic tree (dendrogram) of *Lactobacillus rhamnosus* and *Lactobacillus paracasei* revealing the bacterial diversity according to the milk origin (Regions 1–3). The genetic diversity and geographical stability among the identified strains was evaluated by the spectrum fingerprinting profile, which was analysed and used to construct an Main Spectra Profile (MSP) dendrogram, using the standard Bruker software package (d).

The microbial community was studied with culture-independent methods, based on DNA extraction that offered the possibility of profiling uncultivable members of the microbial community, as well as distinguishing those that are metabolically active. DNA extraction was performed in cheese samples and the genomic material was isolated, by combining mechanical (beat beating) and chemical lysis of the cell. The purified DNA was processed in high through-put sequencing techniques, giving insights into cheese microflora composition and exhibiting unique bacterial profiles which varied in diversity and abundance of taxa. Although the cheeses were visually similar (white color and softness, texture), their bacterial profiles were very different at nearly every classification level. In this purpose, after the DNA extraction, the V3–V4 region of 16S rRNA genes was amplified using universal primers for bacteria and a classification of 16S rRNA targeted amplicon reads was performed using a taxonomic database. The collected data provided interactive visualizations and raw classification outputs per sample

## FoodOmics Structure

### Structure of the Facility

In particular the Aristotle University (AUTH) contributes in FoodOmicsGR\_RI with the Departments of Chemistry (Laboratories of Analytical Chemistry, Food Technology, Environmental Science), the Dept. of Agricultural Sciences (Pomology, Enology, Plant Growth, Apiculture research groups and laboratories), Dept. of Veterinary Science (Animal Husbandry, Histology Laboratories), Dept. of Medicine (Toxicology Research group), Dept. of Informatics (Databases Laboratory), Dept. of Pharmacy (Pharmacognosy), Dept. of Sports Science (Physical Exercise Biochemistry and Nutrition Laboratory) and Dept. of Biology (Animal and Plant Genetics research groups). In total 16 staff members and more than eight new researchers with strong activity on food analysis and bioanalysis, metabolomics, biochemistry, bio-informatics and the genetic and molecular characterization of foods are working together. The core bioanalytical AUTH team is a recognized metabolomics group with pioneering work on method development-validation of metabolomics analytical tools, untargeted and targeted metabolic profiling methods, metabolomics approaches for the classification of foods (fruits, wine, and others) and the study of nutrition related disorders, and multi-analyte methods for the control of foods. The Auth teams are strongly linked and interconnected and have numerous common research projects, co-supervision of PhD and MSc studies and smaller scale research projects.

The University of Athens (UoA) contributes with the Departments of Chemistry (Analytical Chemistry and Food Chemistry laboratories) and the department of Pharmacy (NMR spectroscopy center). The University brings in unique sample sets, expertise in the analysis of foods by High Resolution Mass Spectrometry, and NMR spectroscopy, identification of bioactive compounds, and determination of contaminants. They have long experience in working with the food industry and participation in food-related projects at national and international level and have pioneered the development of metabolic profiling research in Greece.

University of Crete (UoC) contributes with the Department of Chemistry (NMR spectroscopy center). UoC team specializes in the application of NMR metabolomics in food analysis and authentication. UoC has developed protocols for quality control, specializing in the phenolic profiling of olive oil, wine, cheese, beverages. They also developed metabolomics approaches for the authentication of indigenous products (Cretan gravieure, PDO wines), nutrition clinical studies in support of health claims from functional foods.

The Agricultural University of Athens (AUA) is leading the elemental analysis (ICP-MS center) in food and biological samples. The team is working on Food Authentication through Synchronous Fluorescence spectroscopy, high throughput automated methods based on clinical chemistry principles transferred to the agri-food sector and elemental metabolomics linking environmental, food, nutrition and health sciences.

The Biomedical Research Center of the Academy of Athens (Center for Systems Biology) is leading the proteomics analysis. The group has expertise on proteomics and the analysis of protein function with numerous publications and patents in the field of foodomics/nutriomics.

The University of Ioannina (UoI) is leading food safety research (Dept. Chemistry) and the study and characterization of dairy products (Dept. of Agricultural Sciences). The groups have long experience in lactic acid bacteria isolation, identification of probiotics, microbiota analysis in farm animals, analysis of protein structure and function, proteomics on milk/cheese production from indigenous goat. The Chemistry Department groups (Analytical Chemistry and Food Chemistry) are expert groups on the analysis of pollutants, chemotherapeutants and contaminants with emphasis on food safety assessment and the characterization of bioactive, antioxidant and/or xenobiotic compounds in foods.

The University of the Aegean leads the research on the use and exploitation of food waste from industrial processes (Dept. of Environmental Sciences). The group has expertise on agro-industrial-municipal wastewater characterization/treatment, investigating the cultivation of aquatic plants with wastewater for the production of biomass with high content of proteins and starch, the recovery of antioxidant phenolic compounds from olive mill wastewater and the detection of micropollutants.

The International University (Dept. of Nutritional sciences) leads a “horizontal” effort on the assessment and prioritization of research actions and the establishment of food content databases. The group brings expertise in Food Biochemistry and Nutrition Sciences.

**Table S1.** List of MS metabolomics protocols

| Technology | Approach                                             | Instrument                        | Mode                                                     | Specimen/<br>Study                              | Sample Prep                                  | Data<br>Treatment                                    | Statistics                                            | Reference |
|------------|------------------------------------------------------|-----------------------------------|----------------------------------------------------------|-------------------------------------------------|----------------------------------------------|------------------------------------------------------|-------------------------------------------------------|-----------|
| 1          | Untargeted<br>LC-MS<br>polars                        | UPLC- QTOF-MS<br>Premier/Tims-TOF | HILIC, ESI,<br>full scan MS                              | foods,<br>biological<br>fluids, cell<br>culture | LLE, protein<br>precipitation                | XCMS                                                 | PCA, PLS-<br>DA, HCA,<br>AUC ROC                      | 119       |
| 2          | Untargeted<br>LC-MS<br>lipophilic                    |                                   | RPLC, ESI,<br>full scan MS                               | foods,<br>biological<br>fluids, cell<br>culture | LLE, protein<br>precipitation                | XCMS                                                 |                                                       |           |
| 3          | Targeted -<br>bioactive<br>content/antio-<br>xidants | UPLC- QTOF-MS                     | RPLC, ESI<br>negative, bbCID                             | olive oil                                       | LLE<br>(MeOH:H <sub>2</sub> O,<br>80:20 v/v) | Target<br>screening of<br>43<br>antioxidants         | quantitativ<br>e analysis -<br>regression<br>analysis | 6         |
| 4          | LC QTOF<br>MS                                        | UPLC- QTOF-MS                     | RPLC, ESI,<br>bbCID                                      | olive oil                                       | LLE<br>(MeOH:H <sub>2</sub> O,<br>80:20 v/v) | suspect<br>screening of<br>1600 suspect<br>compounds | PCA, PLS-<br>DA, ACO-<br>RF                           | 6         |
| 5          | Untargeted -<br>bioactive<br>content                 | UPLC- QTOF-MS                     | RPLC, ESI,<br>bbCID + Auto<br>MS (for<br>identification) | olive oil                                       | LLE<br>(MeOH:H <sub>2</sub> O,<br>80:20 v/v) | XCMS,<br>CAMERA,<br>IPO                              | PCA, PLS-<br>DA, ACO-<br>RF                           | 6         |
| 6          | Targeted -<br>bioactive<br>content/antio-<br>xidants | UPLC- QTOF-MS                     | RPLC, ESI<br>negative, bbCID                             | fruit juices                                    | direct injection                             | Target<br>screening of<br>37<br>antioxidants         | quantitativ<br>e analysis -<br>regression<br>analysis | 9         |
| 7          | Untargeted -<br>bioactive<br>content                 | UPLC- QTOF-MS                     | RPLC, ESI,<br>bbCID + Auto<br>MS (for<br>identification) | fruit juices                                    | direct injection                             | XCMS,<br>CAMERA,<br>IPO                              | differential<br>analysis,<br>PCA, PLS-<br>DA          | 9         |

|    |                                |                            |                                                 |                                                                |                           |                               |                                    |                |
|----|--------------------------------|----------------------------|-------------------------------------------------|----------------------------------------------------------------|---------------------------|-------------------------------|------------------------------------|----------------|
| 8  | Untargeted - bioactive content | UPLC- QTOF-MS              | RPLC, ESI, bbCID + Auto MS (for identification) | table olives                                                   | LLE (MeOH:H2O, 80:20 v/v) | XCMS, CAMERA, IPO             | differential analysis, PCA, PLS-DA | 30             |
| 9  | Targeted HILIC-MS/MS           |                            |                                                 | Honey/Royal jelly                                              | dilution                  |                               |                                    | 53, 52         |
| 10 | Targeted HILIC-MS/MS           |                            |                                                 | Carobs                                                         | LLE                       |                               |                                    |                |
| 11 | Targeted HILIC-MS/MS           | UPLC-QqQ, Xevo TqD         | HILIC Amide, pos/neg ESI                        | Nutrition (blood, urine, feces, tissue liver kidney brain etc) |                           | Target Lynx, MRM 120 analytes |                                    | 52-54          |
| 12 | Targeted HILIC-MS/MS           |                            |                                                 | various in vitro studies HEPG2, NPCs...                        | LLE                       |                               |                                    |                |
| 13 | Targeted HILIC-MS/MS           | UPLC-QqQ, Thermo Access    |                                                 | milk and wine                                                  |                           | Xcalibur, MRM 80 analytes     |                                    |                |
| 14 | HILIC-MS/MS                    | UPLC-QqQ, Xevo TqD         |                                                 | AminoAcid Panel urine                                          | dilution                  | Target Lynx, MRM 45 analytes  |                                    |                |
| 15 | RPLC-MS/MS                     | UPLC-QqQ, Sciex 3200/6500+ | C8 ESI                                          | Bile Acid Panel blood                                          | LLE                       | MRM 18 analytes               |                                    | In preparation |
| 16 | RPLC-MS/MS                     | UPLC-QqQ, Xevo TqD         | C18 ESI                                         | Carnitines blood                                               | LLE                       | Target Lynx, MRM 16 analytes  |                                    |                |

LC QqQ MS (MRM)

|    |                   |                      |                     |                                        |                                |                                                               |                                  |                            |
|----|-------------------|----------------------|---------------------|----------------------------------------|--------------------------------|---------------------------------------------------------------|----------------------------------|----------------------------|
| 17 | RPLC-MS/MS        | UPLC-QqQ, Xevo TqD   | C18 ESI MRM         | pharmaceuticals in biological samples  | LLE                            | Target Lynx, MRM 84 analytes                                  |                                  | 157                        |
| 18 | RPLC-MS/MS        | UPLC-QqQ, Sciex 3200 | C18 ESI MRM         | Ceramides in blood                     | LLE                            | MultiQuant, MRM 4 analytes                                    | regression analysis              | Begou el at in preparation |
| 19 | RPLC-MS/MS        |                      | C18 ESI             | 25OH VitaminD2 /D3 blood               | LLE/SLE                        | MultiQuant MRM 4 analytes                                     |                                  | in preparation             |
| 20 | GC-MS             | GC-Q Agilent 5973    | EI, full scan       | small molecules untargeted             | MeOX, MSTFA derivatisation     | GAVIN, AMDIS, NIST, Fiehn Agilent & Maurer Spectral Databases | PCA, PLS-DA, HCA, AUC ROC        | 47, 118                    |
| 21 | GC-MS             | GC- EVOQ TQ          | EI, full scan       | VOCs in biological samples             | HS-SMPE, HS                    |                                                               |                                  |                            |
| 22 | GC-MS             |                      | EI, full scan       | VOCs in foods (olive oil, spirits)     | HS-SMPE, HS                    |                                                               |                                  |                            |
| 23 | GC-MS/MS          |                      | EI MRM MS           | small molecules targeted, saliva/blood | MeOX, MSTFA derivatisation     | quantitative 12 acids                                         |                                  |                            |
| 24 | GC-MS/MS          | EI MRM-MS            | Organic Acids urine | MeOX, MSTFA derivatisation             | quantitative 54 acids C3-C18   | regression analysis                                           | Mouskeftara et al in preparation |                            |
| 25 | GC-MS/MS / GC-FID | EI-MRM-MS            | Fatty Acids blood   | Methyl esterification                  | quantitative, 34 acids C12-C24 |                                                               | Mouskeftara et al submitted      |                            |

**Table S2.** List of NMR metabolomics protocols.

|   | <b>Analysis Approach</b> | <b>Aim</b>                            | <b>Instrument MHz</b> | <b>Mode</b>          | <b>Food/Study</b>                                                                                                            | <b>sample Prep</b>  | <b>Statistics / Data Treatment</b> | <b>Reference</b> |
|---|--------------------------|---------------------------------------|-----------------------|----------------------|------------------------------------------------------------------------------------------------------------------------------|---------------------|------------------------------------|------------------|
| 1 | NMR, Untargeted          | Polar metabolite and lipid profiling  | NMR 600/500           | liquid state 1H      | biological fluids (blood, urine), feces extracts, cell culture, olive, olive oil, wine, honey, natural products and extracts | none                | PCA, OPLS-DA, OPLS                 | 64, 122          |
| 2 | NMR, Untargeted          | Polar metabolite profiling            | NMR 300, 500          | liquid state 1H      | liquid foods (wine, honey, juice, coffee, milk etc.)                                                                         | none                | PCA, OPLS-DA, OPLS                 | 58               |
| 3 | QNMR, Targeted           | Phenolic profiling                    | NMR 500               | liquid state 1H, 31P | wine, olive oil, fruits, plants, etc                                                                                         | freeze drying, SPE  | PCA, OPLS-DA, OPLS                 | 59, 60, 52       |
| 4 | NMR, Untargeted          | Polar metabolite profiling            | NMR 300, 500          | liquid state 1H      | solid foods (cheese, coffee, plants)                                                                                         | freeze drying, LE   | PCA, OPLS-DA, OPLS                 | 64               |
| 5 | NMR, Untargeted          | Lipid profiling                       | NMR 300, 500          | liquid state 1H      | solid foods (cheese, coffee, etc)                                                                                            | freeze drying, LE   | PCA, OPLS-DA, OPLS                 | 64               |
| 6 | QNMR, Targeted           | Small molecule compositional analysis | NMR 300, 500          | liquid state 1H      | foods, plants                                                                                                                | depending on sample | -                                  | 11               |
| 7 | NMR, Untargeted          | Compositional analysis                | NMR 400               | solid state 1H, 13C  | meat, cheese, plants, fruits, etc                                                                                            | none                | PCA, OPLS-DA, OPLS                 | 12               |
| 8 | NMR, Untargeted          | Polar metabolite and lipid profiling  | NMR 400               | solid state 1H, 13C  | tissues, cell culture                                                                                                        | none                | PCA, OPLS-DA, OPLS                 |                  |



**Table S3.** List of Genetics-Genomics protocols.

|   | <b>Aim</b>                                           | <b>specimen</b>           | <b>Platform</b>    | <b>Method</b>                                     | <b>Instrument Platform</b> | <b>Reference</b> |
|---|------------------------------------------------------|---------------------------|--------------------|---------------------------------------------------|----------------------------|------------------|
| 1 | Genetic identification of species in food products   | meat, fish, seafood, game | DNA barcoding      | gene DNA sequencing                               | PCR, DNA Sequencer         | 73               |
| 2 | Traceability of animal species in food products      | meat products             | Real time PCR      | proportional DNA amplification and quantification | rt-PCR                     |                  |
| 3 | Species milk identification                          | sheep milk, goat milk     | Casein dinstiction | gene DNA sequencing                               | PCR, DNA Sequencer         |                  |
| 4 | Origin traceability of wild and hatchery individuals | sea bream, sea bass       | SNP panels         | SNP genotyping (Kasp)                             | rt-PCR                     | 74, 75           |
| 5 | Genomic characterization of livestock species        | livestock species         | SNP arrays         | GWAS analysis                                     | Illumina NGS               | 76               |
| 6 | Microbiome analysis                                  | Cheese                    | NGS                | 16S rRNA sequencing                               | Illumina NGS               | 93               |
| 7 | Strain Typing                                        | Cheese                    | Ribo Printing      | rRNA gene restriction pattern analysis            | DuPont Ribo Printer        |                  |

**Table S4.** List of proteomics protocols.

|   | <b>Analysis</b>                          | <b>Technology</b>                 | <b>Instrument</b>           | <b>Food/Study</b>          | <b>Sample Prep</b>                                                | <b>Data Treatment</b>                         | <b>Statistics</b>              | <b>Reference</b> |
|---|------------------------------------------|-----------------------------------|-----------------------------|----------------------------|-------------------------------------------------------------------|-----------------------------------------------|--------------------------------|------------------|
| 1 | Proteomics                               | High Resolution Mass Spectrometry | nanoLC-MS/MS Orbitrap Elite | Dairy Products             | Protein extraction/Tryptic digestion (GR1005463, GR1009574)       | Total proteins                                | Unique Proteins                | 77               |
| 2 | Peptidomics                              | High Resolution Mass Spectrometry | nanoLC-MS/MS Orbitrap Elite | Dairy Products             | Peptide extraction ((GR1005304, GR1005463, EPA1748297, GR1005463) | Natural Occurring Peptides and Small Proteins | Unique Peptides/Small proteins | 77               |
| 3 | Proteomics                               | High Resolution Mass Spectrometry | nanoLC-MS/MS Orbitrap Elite | Wine                       | Protein extraction/Tryptic digestion (GR1005463, EPA1748297)      | Total proteins                                | Unique Proteins                |                  |
| 4 | Peptidomics                              | High Resolution Mass Spectrometry | nanoLC-MS/MS Orbitrap Elite | Wine                       | Peptide extraction (GR1005304, GR1005463, EPA1748297, GR1005463)  | Natural Occurring Peptides and Small Proteins | Unique Peptides/Small proteins |                  |
| 5 | Proteomics                               | High Resolution Mass Spectrometry | nanoLC-MS/MS Orbitrap Elite | Honey                      | Protein extraction/Tryptic digestion (GR1005463, EPA1748297)      | Total proteins                                | Unique Proteins                |                  |
| 6 | Peptidomics                              | High Resolution Mass Spectrometry | nanoLC-MS/MS Orbitrap Elite | Honey                      | Peptide extraction (GR1005304, GR1005463, EPA1748297, GR1005463)  | Natural Occurring Peptides and Small Proteins | Unique Peptides/Small proteins |                  |
| 7 | proteomics analysis of bacterial strains | MALDI-TOF MS                      | Bruker LT Microflex         | Cheese microbiome analysis |                                                                   |                                               |                                |                  |

**Table S5.** List of MS elemental metabolomics protocols.

| <b>Technique</b>                               | <b>Instrument</b>      | <b>Sample Preparation</b>    | <b>Analytes</b>                            | <b>reference</b> |
|------------------------------------------------|------------------------|------------------------------|--------------------------------------------|------------------|
| Inductively Coupled Plasma - Mass Spectrometry | Perkin Elmer ELAN 9000 | microwave assisted digestion | Rare Earth Elements - Ultra trace elements | 82–86            |

**Table S6.** List of food safety assessment protocols.

| <b>.</b> | <b>Instrumentation</b>          | <b>Sample preparation Method</b> | <b>Sample</b>                             | <b>Purpose</b>                                                       | <b>reference</b> |
|----------|---------------------------------|----------------------------------|-------------------------------------------|----------------------------------------------------------------------|------------------|
| 1        | UHPLC-LTQ Orbitrap MS           | QuEChERS                         | Honey                                     | Pesticide Residues                                                   |                  |
| 2        | UHPLC-LTQ Orbitrap MS/<br>GC-MS | QuEChERS                         | Oil                                       | Pesticide Residues                                                   | 140              |
| 3        | UHPLC-LTQ Orbitrap MS           | QuEChERS                         | Wine                                      | Pesticide Residues                                                   | 144              |
| 4        | UHPLC-LTQ Orbitrap MS           | QuEChERS                         | Milk                                      | Pesticide Residues                                                   | 143              |
| 5        | UPLC-MS/MS (QTOF or QqQ)        | LLE/SPE                          | foods                                     | Determination of NIAS in Foods and food contact materials            | 150              |
| 6        | GC-MS/MS                        | LLE/SPE                          | foods                                     | Determination of endocrine disruptors in Foods                       | 151              |
| 7        | LC-MS/MS                        | LLE/SPE                          | foods                                     | Determination of endocrine disruptors (including Bisphenol) in Foods | 146              |
| 8        | RPLC-MS/MS                      | SLE                              | Fish tissue, porcine, poultry meat        | Veterinary drug residues (17 sulfonamides and 5 tetracyclines)       | 152              |
| 9        | RPLC-MS/MS                      | SLE/UAE                          | Milk powder, butter, fish tissue and eggs | Veterinary drugs and pharmaceutical residues (115 compounds)         | 153              |
| 10       | UHPLC-QTOF MS                   | fish: SLE/UAE milk:<br>LLE/SPE   | Milk and fish tissue                      | Veterinary drugs and pharmaceutical residues (143 compounds)         | 154              |
| 11       | HILIC-MS/MS                     | SLE                              | Bovine muscle tissue                      | Veterinary pharmaceuticals (76 compounds, 13 classes)                | 155              |
| 12       | HILIC-MS/MS                     | SLE/dSPE                         | Animal tissues and eggs                   | Coccidiostats (16 compounds)                                         | 156              |

**Table S7.** List of food authenticity/traceability RIS priorities that are covered by FoodOmicsGR\_RI work.

| <b>Relevant RIS3 Priorities Related to Food Characterization and Development of New Products</b> |                                                                                                                                                                                                                                                                                          |
|--------------------------------------------------------------------------------------------------|------------------------------------------------------------------------------------------------------------------------------------------------------------------------------------------------------------------------------------------------------------------------------------------|
| 1                                                                                                | Improving the competitive position of Greek food products from agricultural, livestock and aquaculture products in international markets                                                                                                                                                 |
| 2                                                                                                | Enhancement and improvement of characteristics of Greek products of primary production with an emphasis on quality and safety, 3                                                                                                                                                         |
| 3                                                                                                | Utilization of "omics" technologies for the genetic/molecular characterization with the scope of assessing and improving domestic agricultural biodiversity (vegetables, herbs, wild plants, bees, animals, breeds, fish, etc ) and their consolidation as Greek product                 |
| 4                                                                                                | Development of methods and technologies for the control of authenticity (authentication) of domestic agricultural products, identification and/or certification of geographic origin with modern techniques                                                                              |
| 5                                                                                                | Highlighting and improving the unique characteristics of Greek processed products with emphasis on quality and product safety                                                                                                                                                            |
| 6                                                                                                | Improve the quality, durability and safety of foods, including aquaculture products, beverages and feed by the development and use of improved control methodologies                                                                                                                     |
| 7                                                                                                | Development and use of fast and low cost non-destructive and non-invasive methods for the control and detection of biological, chemical and physical hazards (such as persistent organic contaminants, heavy metals, perfluorinated compounds and toxins) in foods and in the food chain |
| 8                                                                                                | Development of novel products containing bioactive ingredients from the Greek flora and marine organisms (e.g. natural colours, antioxidants, sweeteners)                                                                                                                                |
| 9                                                                                                | Development of methods for the recovery of these components and their integration into the final product avoiding the loss of their biological properties                                                                                                                                |
| 10                                                                                               | Analysis of Greek foods with emphasis on micro-nutrients, molecular analysis and characterization of domestic genotypes (varieties) with interesting commercial characteristics and Complement Greek Food databases                                                                      |

**Table S8.** List of food nutritional value RIS priorities that are covered by FoodOmicsGR\_RI work.

| <b>Relevant Nutrition health and wellness related RIS3 priorities</b> |                                                                                                                                                                                                                                                                                                                                                                                                                 |
|-----------------------------------------------------------------------|-----------------------------------------------------------------------------------------------------------------------------------------------------------------------------------------------------------------------------------------------------------------------------------------------------------------------------------------------------------------------------------------------------------------|
| 1                                                                     | Enhancing the understanding of the relationship between diet, health and wellbeing in relation to agricultural food products and ingredients                                                                                                                                                                                                                                                                    |
| 2                                                                     | Assessment of the nutritional value of Greek food                                                                                                                                                                                                                                                                                                                                                               |
| 3                                                                     | The role of traditional Greek nutrition and indigenous foods in the enhancement of the health of the Greek population                                                                                                                                                                                                                                                                                           |
| 4                                                                     | Creating food products with reduced concentration in undesired food ingredients either for the whole population or food for consumers with special dietary requirements, such as allergens, gluten etc                                                                                                                                                                                                          |
| 5                                                                     | Investigation of the relationship between nutrition, health and wellness: Consumer issues, socially, culturally, technologically as well as traditional aspects of food, including issues related to nutritional disorders, with the aim to develop foods and diets appropriate to meet the particular needs of special consumer groups (people with allergies, pregnant women, infants, children, elderly, etc |
| 6                                                                     | Study of genetic variations in the metabolism of essential nutrients (Nutrigenetics), and the role of nutrients in gene expression (Nutrigenomics)                                                                                                                                                                                                                                                              |
| 7                                                                     | Recording and promoting health claims of Greek products with an emphasis on traditional products                                                                                                                                                                                                                                                                                                                |
